# Supplementary material for: Yeast Species, Strains, and Growth Media Mediate Attraction of Drosophila suzukii (Diptera: Drosophilidae)
Source: Insects. 2019 Jul 31;10(8):228. doi: 10.3390/insects10080228 (PMC6722520; doi:10.3390/insects10080228)
Supplement: Supplementary file 1 [file insects-10-00228-s001.zip]

Archive with 5 entries (5 files):
- Lasa_suppl_flies/Table S1.pdf
- Lasa_suppl_flies/Table S2.pdf
- Lasa_suppl_flies/Table S3.pdf
- Lasa_suppl_flies/Table S4.pdf
- Lasa_suppl_flies/Table S5.pdf
