# Supplementary material for: Yeast Species, Strains, and Growth Media Mediate Attraction of Drosophila suzukii (Diptera: Drosophilidae)
Source: Insects. 2019 Jul 31;10(8):228. doi: 10.3390/insects10080228 (PMC6722520; doi:10.3390/insects10080228)
Supplement: Supplementary file 1 [file insects-10-00228-s001.zip › Lasa_suppl_flies/Table S1.pdf]

**Table S1.** Growth of yeast species in YPD medium.

| <b>Yeast species</b>             | <b>Cells/ml (<math>\pm</math> SE)</b> |
|----------------------------------|---------------------------------------|
| <i>C. glabrata</i>               | $1.7 \pm 0.2 \times 10^9$ <b>a</b>    |
| <i>P. membranifaciens</i>        | $1.3 \pm 0.8 \times 10^9$ <b>ab</b>   |
| <i>C. humilis</i>                | $1.2 \pm 0.2 \times 10^9$ <b>b</b>    |
| <i>C. tropicalis</i>             | $1.2 \pm 0.4 \times 10^9$ <b>abc</b>  |
| <i>P. kudriavzevii</i>           | $1.1 \pm 0.1 \times 10^9$ <b>bc</b>   |
| <i>P. manshurica</i>             | $1.1 \pm 0.1 \times 10^9$ <b>bc</b>   |
| <i>P. anomala</i>                | $9.9 \pm 2.0 \times 10^8$ <b>bc</b>   |
| <i>P. kluyveri</i>               | $9.1 \pm 0.9 \times 10^8$ <b>bc</b>   |
| <i>H. lachancei</i>              | $9.0 \pm 1.5 \times 10^8$ <b>bc</b>   |
| <i>C. boidinii</i>               | $5.6 \pm 0.3 \times 10^8$ <b>c</b>    |
| <i>S. cerevisiae</i> (Tradi-Pan) | $4.3 \pm 0.2 \times 10^8$ <b>d</b>    |

Mean growth of different yeast species following inoculation of  $\sim 1 \times 10^6$  cells in 50 ml of yeast-peptone dextrose (YPD) broth and incubation at 25 °C during 48 h at 120 rpm orbital agitation. Three replicates were performed. Values followed by different letters indicate statistical differences (ANOVA, Tukey,  $p < 0.05$ ).
