# Supplementary material for: Yeast Species, Strains, and Growth Media Mediate Attraction of Drosophila suzukii (Diptera: Drosophilidae)
Source: Insects. 2019 Jul 31;10(8):228. doi: 10.3390/insects10080228 (PMC6722520; doi:10.3390/insects10080228)
Supplement: Supplementary file 1 [file insects-10-00228-s001.zip › Lasa_suppl_flies/Table S2.pdf]

**Table S2.** Statistical analyses applied to results in Figure 2.

The t-test values applied to results in Figure 2a,b,c in terms of means, difference between means, SE of that difference for each sex of *D. suzukii*.

| a)                                                                                                   | Yeast        | Males $\pm$ SE | Student t-test                                             | Females $\pm$ SE | Student t-test                                            |
|------------------------------------------------------------------------------------------------------|--------------|----------------|------------------------------------------------------------|------------------|-----------------------------------------------------------|
| Sucrose                                                                                              | Tredi-Pan-Sc | 7.1 $\pm$ 0.7  | NS t=0.820; df=15; p=0.425; Mean diff=0.750; SE diff=0.915 | 7.0 $\pm$ 1.0    | NS t=0.716; df=15; p=0.485; Mean diff=0.106; SE diff=1.48 |
|                                                                                                      | RfM1-Sc      | 6.4 $\pm$ 0.6  |                                                            | 8.1 $\pm$ 0.7    |                                                           |
| Corn syrup                                                                                           | Tredi-Pan-Sc | 5.1 $\pm$ 0.6  | NS t=1.51; df=15; p=0.151; Mean diff=1.75; SE diff=1.16    | 5.6 $\pm$ 0.6    | ** t=2.23; df=15; p=0.041; Mean diff=2.88; SE diff=1.29   |
|                                                                                                      | RfM1-Sc      | 6.8 $\pm$ 0.8  |                                                            | 8.5 $\pm$ 0.9    |                                                           |
|                                                                                                      |              |                |                                                            |                  |                                                           |
|                                                                                                      |              |                |                                                            |                  |                                                           |
| b)                                                                                                   | Yeast        | Males $\pm$ SE | Student t-test                                             | Females $\pm$ SE | Student t-test                                            |
| Sucrose                                                                                              | Tredi-Pan-Sc | 6.6 $\pm$ 1.2  | NS t=0.544; df=7; p=0.603; Mean diff=1.38; SE diff=2.53    | 7.3 $\pm$ 1.0    | NS t=0.629; df=7; p=0.550; Mean diff=1.25; SE diff=1.99   |
|                                                                                                      | RfM2-Hu      | 5.3 $\pm$ 1.4  |                                                            | 6.0 $\pm$ 1.1    |                                                           |
| Corn syrup                                                                                           | Tredi-Pan-Sc | 6.3 $\pm$ 1.3  | NS t=1.40; df=7; p=0.204; Mean diff=2.75; SE diff=1.96     | 8.9 $\pm$ 0.7    | ** t=3.75; df=7; p=0.007; Mean diff=4.88; SE diff=1.30    |
|                                                                                                      | RfM2-Hu      | 3.5 $\pm$ 0.9  |                                                            | 4.0 $\pm$ 0.7    |                                                           |
|                                                                                                      |              |                |                                                            |                  |                                                           |
|                                                                                                      |              |                |                                                            |                  |                                                           |
| c)                                                                                                   | Yeast        | Males $\pm$ SE | Student t-test                                             | Females $\pm$ SE | Student t-test                                            |
| Sucrose                                                                                              | Tredi-Pan-Sc | 7.6 $\pm$ 1.4  | NS t=1.81; df=7; p=0.113; Mean diff=2.08; SE diff=1.59     | 9.8 $\pm$ 1.3    | NS t=1.48; df=7; p=0.182; Mean diff=3.00; SE diff=2.03    |
|                                                                                                      | RfM3-Hu      | 4.8 $\pm$ 0.8  |                                                            | 6.8 $\pm$ 1.3    |                                                           |
| Corn syrup                                                                                           | Tredi-Pan-Sc | 5.8 $\pm$ 0.9  | NS t=0.887; df=7; p=0.404; Mean diff=1.50; SE diff=1.69    | 7.4 $\pm$ 0.8    | ** t=5.86; df=7; p<0.001; Mean diff=3.50; SE diff=0.598   |
|                                                                                                      | RfM2-Hu      | 4.3 $\pm$ 0.9  |                                                            | 3.9 $\pm$ 0.5    |                                                           |
|                                                                                                      |              |                |                                                            |                  |                                                           |
|                                                                                                      |              |                |                                                            |                  |                                                           |
| Mean diff. indicates difference between means; SE diff. indicates standard error of that difference. |              |                |                                                            |                  |                                                           |
