# Supplementary material for: Yeast Species, Strains, and Growth Media Mediate Attraction of Drosophila suzukii (Diptera: Drosophilidae)
Source: Insects. 2019 Jul 31;10(8):228. doi: 10.3390/insects10080228 (PMC6722520; doi:10.3390/insects10080228)
Supplement: Supplementary file 1 [file insects-10-00228-s001.zip › Lasa_suppl_flies/Table S3.pdf]

**Table S3.** Statistical analyses applied to results in Figure 3.

The t-test values applied to results in Figure 3a,b,c in terms of means, difference between means, SE of that difference for each sex of *D. suzukii*.

| <b>a)</b>                                                                                            | <b>Yeast</b> | <b>Males ± SE</b> |     | <b>Student t-test</b>                               | <b>Females ± SE</b> |     | <b>Student t-test</b>                               |
|------------------------------------------------------------------------------------------------------|--------------|-------------------|-----|-----------------------------------------------------|---------------------|-----|-----------------------------------------------------|
| Sucrose                                                                                              | Tredi-Pan-Sc | 7.6 ± 1.1         | **  | t=2.88; df=7; p=0.024; Mean diff=4.88; SE diff=1.69 | 8.6 ± 0.9           | *** | t=5.87; df=7; p<0.001; Mean diff=6.25; SE diff=1.06 |
|                                                                                                      | RiM1-Hu      | 2.8 ± 0.9         |     |                                                     | 2.4 ± 0.9           |     |                                                     |
| Corn syrup                                                                                           | Tredi-Pan-Sc | 4.3 ± 0.8         | *** | t=5.24; df=7; p=0.001; Mean diff=7.00; SE diff=1.34 | 3.5 ± 0.9           | **  | t=3.32; df=7; p=0.013; Mean diff=6.45; SE diff=2.03 |
|                                                                                                      | RiM1-Hu      | 11.3 ± 0.8        |     |                                                     | 10.3 ± 1.4          |     |                                                     |
|                                                                                                      |              |                   |     |                                                     |                     |     |                                                     |
|                                                                                                      |              |                   |     |                                                     |                     |     |                                                     |
| <b>b)</b>                                                                                            | <b>Yeast</b> | <b>Males ± SE</b> |     | <b>Student t-test</b>                               | <b>Females ± SE</b> |     | <b>Student t-test</b>                               |
| Sucrose                                                                                              | Tredi-Pan-Sc | 10.8 ± 1.0        | **  | t=4.49; df=7; p=0.003; Mean diff=7.13; SE diff=1.59 | 9.5 ± 1.4           | **  | t=3.35; df=7; p=0.012; Mean diff=6.25; SE diff=1.87 |
|                                                                                                      | RiM2-Hu      | 3.6 ± 0.7         |     |                                                     | 3.3 ± 0.6           |     |                                                     |
| Corn syrup                                                                                           | Tredi-Pan-Sc | 3.9 ± 0.5         | *** | t=5.15; df=7; p=0.001; Mean diff=8.75; SE diff=1.70 | 4.5 ± 0.5           | *** | t=5.07; df=7; p=0.001; Mean diff=6.88; SE diff=1.36 |
|                                                                                                      | RiM2-Hu      | 12.6 ± 1.3        |     |                                                     | 11.4 ± 1.1          |     |                                                     |
|                                                                                                      |              |                   |     |                                                     |                     |     |                                                     |
|                                                                                                      |              |                   |     |                                                     |                     |     |                                                     |
| <b>c)</b>                                                                                            | <b>Yeast</b> | <b>Males ± SE</b> |     | <b>Student t-test</b>                               | <b>Females ± SE</b> |     | <b>Student t-test</b>                               |
| Sucrose                                                                                              | Tredi-Pan-Sc | 4.3 ± 0.6         | **  | t=4.98; df=7; p=0.002; Mean diff=7.75; SE diff=1.56 | 4.6 ± 0.6           | **  | t=4.23; df=7; p=0.004; Mean diff=6.50; SE diff=1.54 |
| Corn syrup                                                                                           | RiM2-Hu      | 12.0 ± 1.4        |     |                                                     | 11.1 ± 1.0          |     |                                                     |
|                                                                                                      |              |                   |     |                                                     |                     |     |                                                     |
| Mean diff. indicates difference between means; SE diff. indicates standard error of that difference. |              |                   |     |                                                     |                     |     |                                                     |
