# Supplementary material for: Yeast Species, Strains, and Growth Media Mediate Attraction of Drosophila suzukii (Diptera: Drosophilidae)
Source: Insects. 2019 Jul 31;10(8):228. doi: 10.3390/insects10080228 (PMC6722520; doi:10.3390/insects10080228)
Supplement: Supplementary file 1 [file insects-10-00228-s001.zip › Lasa_suppl_flies/Table S4.pdf]

**Table S4.** Statistical analyses applied to results in Table 3.

The t-test values applied to results in Table 3 in terms of means, difference between means, SE of that difference for each sex of *D. sukuzii*. In all cases yeasts were grown in 5.5% sucrose solution.

| Yeast                                                                                                | Mean males $\pm$ SE |     | Student t-test                                        | Mean females $\pm$ SE |     | Student t-test                                        |
|------------------------------------------------------------------------------------------------------|---------------------|-----|-------------------------------------------------------|-----------------------|-----|-------------------------------------------------------|
| <i>S. cerevisiae</i>                                                                                 | 6.5 $\pm$ 0.7       | NS  | t=0.646; df=7; p=0.539; Mean diff=0.875; SE diff=1.36 | 6.6 $\pm$ 0.9         | NS  | t=1.51; df=7; p=0.174; Mean diff=2.0; SE diff=1.32    |
| <i>C. boidinii</i>                                                                                   | 5.6 $\pm$ 1.1       |     |                                                       | 4.6 $\pm$ 0.6         |     |                                                       |
| <i>S. cerevisiae</i>                                                                                 | 7.3 $\pm$ 1.0       | NS  | t=1.28; df=7; p=0.242; Mean diff=3.13; SE diff=2.45   | 7.9 $\pm$ 1.3         | NS  | t=1.65; df=7; p=0.143; Mean diff=3.75; SE diff=2.27   |
| <i>C. glabrata</i>                                                                                   | 4.1 $\pm$ 1.6       |     |                                                       | 4.1 $\pm$ 1.3         |     |                                                       |
| <i>S. cerevisiae</i>                                                                                 | 4.0 $\pm$ 1.1       | NS  | t=1.23; df=7; p=0.258; Mean diff=1.38; SE diff=1.12   | 4.6 $\pm$ 0.9         | NS  | t=0.609; df=7; p=0.562; Mean diff=1.13; SE diff=1.85  |
| <i>C. humilis</i>                                                                                    | 5.4 $\pm$ 0.9       |     |                                                       | 5.8 $\pm$ 1.2         |     |                                                       |
| <i>S. cerevisiae</i>                                                                                 | 4.9 $\pm$ 0.9       | NS  | t=1.76; df=7; p=0.122; Mean diff=3.25; SE diff=1.85   | 6.0 $\pm$ 1.0         | NS  | t=0.157; df=7; p=0.879; Mean diff=0.250; SE diff=1.59 |
| <i>C. tropicalis</i>                                                                                 | 8.1 $\pm$ 1.2       |     |                                                       | 5.8 $\pm$ 1.1         |     |                                                       |
| <i>S. cerevisiae</i>                                                                                 | 3.6 $\pm$ 0.9       | NS  | t=0.478; df=7; p=0.647; Mean diff=0.625; SE diff=1.31 | 4.5 $\pm$ 0.9         | NS  | t=0.728; df=7; p=0.490; Mean diff=0.875; SE diff=1.20 |
| <i>H. lachancei</i>                                                                                  | 3.0 $\pm$ 0.5       |     |                                                       | 3.6 $\pm$ 0.8         |     |                                                       |
| <i>S. cerevisiae</i>                                                                                 | 7.6 $\pm$ 1.0       | **  | t=2.56; df=7; p=0.037; Mean diff=4.13; SE diff=1.61   | 8.9 $\pm$ 1.5         | NS  | t=1.49; df=7; p=0.180; Mean diff=3.63; SE diff=2.43   |
| <i>P. anomala</i>                                                                                    | 3.5 $\pm$ 0.6       |     |                                                       | 5.3 $\pm$ 1.0         |     |                                                       |
| <i>S. cerevisiae</i>                                                                                 | 9.6 $\pm$ 0.8       | *** | t=6.12; df=7; p<0.001; Mean diff=8.50; SE diff=1.39   | 8.6 $\pm$ 0.7         | *** | t=5.73; df=7; p<0.001; Mean diff=6.50; SE diff=1.13   |
| <i>P. kluyveri</i>                                                                                   | 1.1 $\pm$ 0.6       |     |                                                       | 2.1 $\pm$ 0.7         |     |                                                       |
| <i>S. cerevisiae</i>                                                                                 | 3.6 $\pm$ 0.9       | NS  | t=0.557; df=7; p=0.597; Mean diff=0.750; SE diff=1.35 | 6.6 $\pm$ 0.4         | NS  | t=1.74; df=7; p=0.125; Mean diff=2.38; SE diff=1.36   |
| <i>P. kudriavzevii</i>                                                                               | 4.4 $\pm$ 0.9       |     |                                                       | 4.3 $\pm$ 1.2         |     |                                                       |
| <i>S. cerevisiae</i>                                                                                 | 6.8 $\pm$ 1.4       | NS  | t=2.12; df=7; p=0.072; Mean diff=3.63; SE diff=1.71   | 7.9 $\pm$ 1.2         | **  | t=3.74; df=7; p=0.007; Mean diff=5.38; SE diff=1.44   |
| <i>P. manshurica</i>                                                                                 | 3.1 $\pm$ 0.5       |     |                                                       | 3.0 $\pm$ 0.6         |     |                                                       |
| <i>S. cerevisiae</i>                                                                                 | 6.1 $\pm$ 0.8       | NS  | t=1.06; df=7; p=0.324; Mean diff=1.13; SE diff=1.06   | 7.4 $\pm$ 1.3         | NS  | t=1.92; df=7; p=0.097; Mean diff=4.00; SE diff=2.09   |
| <i>P. membranifaciens</i>                                                                            | 5.0 $\pm$ 0.4       |     |                                                       | 3.4 $\pm$ 1.0         |     |                                                       |
|                                                                                                      |                     |     |                                                       |                       |     |                                                       |
| Mean diff. indicates difference between means; SE diff. indicates standard error of that difference. |                     |     |                                                       |                       |     |                                                       |
