# Supplementary material for: Yeast Species, Strains, and Growth Media Mediate Attraction of Drosophila suzukii (Diptera: Drosophilidae)
Source: Insects. 2019 Jul 31;10(8):228. doi: 10.3390/insects10080228 (PMC6722520; doi:10.3390/insects10080228)
Supplement: Supplementary file 1 [file insects-10-00228-s001.zip › Lasa_suppl_flies/Table S5.pdf]

**Table S5.** Statistical analyses applied to results in Table 4.

The t-test values applied to results in Table 4 in terms of means, difference between means, SE of that difference for each sex of *D. suzukii*. In all cases yeasts were grown in YPD medium.

| Yeast                                                                                                | Mean males $\pm$ SE |    | Student t-test                                       | Mean females $\pm$ SE |     | Student t-test                                        |
|------------------------------------------------------------------------------------------------------|---------------------|----|------------------------------------------------------|-----------------------|-----|-------------------------------------------------------|
| <i>S. cerevisiae</i>                                                                                 | 8.3 $\pm$ 1.6       | NS | t=0.443; df=7; p=0.671; Mean diff=1.38; SE diff=3.10 | 7.3 $\pm$ 1.5         | NS  | t=0.171; df=7; p=0.865; Mean diff=0.5; SE diff=2.83   |
| <i>C. boidinii</i>                                                                                   | 6.9 $\pm$ 1.6       |    |                                                      | 6.8 $\pm$ 1.5         |     |                                                       |
| <i>S. cerevisiae</i>                                                                                 | 5.9 $\pm$ 1.0       | NS | t=0.275; df=7; p=0.791; Mean diff=0.37; SE diff=1.36 | 5.3 $\pm$ 0.8         | NS  | t=222; df=7; p=0.831; Mean diff=0.37; SE diff=1.69    |
| <i>C. glabrata</i>                                                                                   | 6.3 $\pm$ 0.6       |    |                                                      | 4.9 $\pm$ 1.1         |     |                                                       |
| <i>S. cerevisiae</i>                                                                                 | 5.3 $\pm$ 1.4       | NS | t=0.158; df=7; p=0.879; Mean diff=0.37; SE diff=2.37 | 5.1 $\pm$ 0.7         | NS  | t=0.076; df=7; p=0.941; Mean diff=0.125; SE diff=1.64 |
| <i>C. humilis</i>                                                                                    | 4.9 $\pm$ 1.2       |    |                                                      | 5.0 $\pm$ 1.2         |     |                                                       |
| <i>S. cerevisiae</i>                                                                                 | 5.1 $\pm$ 0.9       | NS | t=1.11; df=7; p=0.305; Mean diff=2.38; SE diff=2.15  | 4.6 $\pm$ 1.4         | NS  | t=0.580; df=7; p=0.580; Mean diff=1.50; SE diff=2.58  |
| <i>C. tropicalis</i>                                                                                 | 7.5 $\pm$ 1.7       |    |                                                      | 6.1 $\pm$ 1.5         |     |                                                       |
| <i>S. cerevisiae</i>                                                                                 | 7.3 $\pm$ 1.4       | NS | t=1.26; df=7; p=0.249; Mean diff=2.63; SE diff=2.09  | 6.8 $\pm$ 0.5         | NS  | t=1.46; df=7; p=0.188; Mean diff=1.38; SE diff=0.944  |
| <i>H. lachancei</i>                                                                                  | 4.6 $\pm$ 0.9       |    |                                                      | 5.4 $\pm$ 0.8         |     |                                                       |
| <i>S. cerevisiae</i>                                                                                 | 6.6 $\pm$ 1.2       | NS | t=1.30; df=7; p=0.234; Mean diff=2.00; SE diff=1.54  | 9.9 $\pm$ 0.6         | **  | t=4.46; df=7; p=0.003; Mean diff=4.38; SE diff=0.981  |
| <i>P. anomala</i>                                                                                    | 4.6 $\pm$ 0.8       |    |                                                      | 5.5 $\pm$ 0.8         |     |                                                       |
| <i>S. cerevisiae</i>                                                                                 | 9.1 $\pm$ 0.7       | ** | t=4.66; df=7; p=0.002; Mean diff=5.50; SE diff=1.18  | 9.3 $\pm$ 0.9         | **  | t=4.68; df=7; p=0.002; Mean diff=6.38; SE diff=1.36   |
| <i>P. kluyveri</i>                                                                                   | 3.6 $\pm$ 0.8       |    |                                                      | 2.9 $\pm$ 0.6         |     |                                                       |
| <i>S. cerevisiae</i>                                                                                 | 4.9 $\pm$ 1.0       | NS | t=0.835; df=7; p=0.431; Mean diff=1.25; SE diff=1.50 | 6.5 $\pm$ 0.8         | NS  | t=1.30; df=7; p=0.234; Mean diff=2.00; SE diff=1.54   |
| <i>P. kudriavzevii</i>                                                                               | 3.6 $\pm$ 0.7       |    |                                                      | 4.5 $\pm$ 0.9         |     |                                                       |
| <i>S. cerevisiae</i>                                                                                 | 7.5 $\pm$ 1.2       | NS | t=2.25; df=7; p=0.059; Mean diff=4.25; SE diff=1.89  | 10.5 $\pm$ 0.9        | *** | t=6.61; df=7; p<0.001; Mean diff=8.00; SE diff=1.21   |
| <i>P. manshurica</i>                                                                                 | 3.3 $\pm$ 1.0       |    |                                                      | 3.0 $\pm$ 0.6         |     |                                                       |
| <i>S. cerevisiae</i>                                                                                 | 7.0 $\pm$ 1.4       | NS | t=2.35; df=7; p=0.051; Mean diff=4.50; SE diff=1.92  | 8.5 $\pm$ 1.4         | **  | t=3.58; df=7; p=0.009; Mean diff=5.88; SE diff=1.64   |
| <i>P. membranifaciens</i>                                                                            | 2.5 $\pm$ 0.8       |    |                                                      | 2.6 $\pm$ 0.9         |     |                                                       |
|                                                                                                      |                     |    |                                                      |                       |     |                                                       |
| Mean diff. indicates difference between means; SE diff. indicates standard error of that difference. |                     |    |                                                      |                       |     |                                                       |
